# Supplementary material for: HAP40 is a conserved central regulator of Huntingtin and a potential modulator of Huntington’s disease pathogenesis
Source: PubMed Central journal article supplement (PMC9295956; doi:10.1371/journal.pgen.1010302), 2022-07-19
Supplement: pgen.1010302.s002.pdf [file pgen.1010302.s002.pdf]

(A)

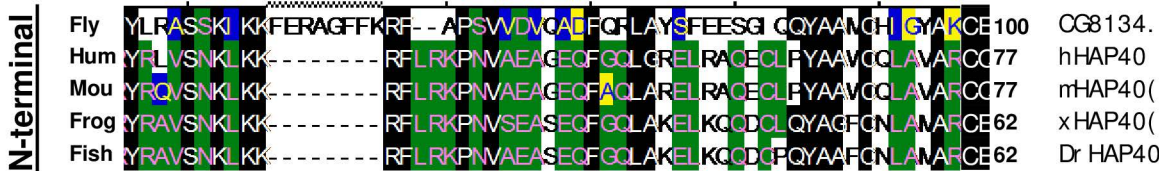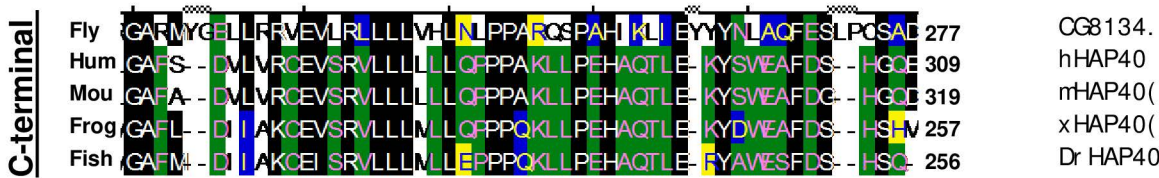



**(C)**

Start point of deletion

end point of deletion

cgctttgcgccccagcgtggtcgatgtgcaggcggacttccagcgcactggcctacagcttc  
 R F A P S V V D V Q A D F Q R L A Y S F  
 gaggagtcgggcatacagcagtatgcccacattggctatgccaaagtgcgag  
 E E S G I Q Q Y A A M C H I G Y A K C E  
 tcctacggcggcggcaccgcagcgcgaatcggagggcctatctgcccgcagctagatccttc  
 S Y G G A P Q R E S E A Y L R A A R S F  
 ctagcggcgcacaacgagtcgggcgactgcattctgcccaccgccactcgggatttcgg  
 L A A H N E S G R L H L R T R H S G F R  
 gagggagcgggtgcactgctatcaccgtgcccgatcgagcgggtggacggttgcgtcttc  
 E G A V H C Y H R A A D R A V D G C V F  
 aaggcggccattctgcccgagttgaagcagctgcagcggcagctggacagcaccagcagc  
 K A A I L R E L K Q L Q R Q L D S T S S  
 tttgcctcgcgccaccatcagatccatgacctggaatcagcgcggaaacgagtgccag  
 F A S P T H Q I H D L E I S A E T S G Q  
 cgcggcagattttcgcagtgcaactgcagcattacgacgacattgtggacaatgtttacgag  
 R G D F R S A L Q H Y D D I V D N V Y E  
 cgacgcgggtgctcgcgatgtacggtgaaactattgcccgcggttgaggtgctgcgtctgctg  
 R R G A R M Y G E L L R R V E V L R L L  
 ctctagtcatttgaacctgcctcccgcagccagtcaccgccccacatcaagctgatc  
 L L V H L N L P P A R Q S P A H I K L I  
 gagtactactacaacctggcgcagttcagagtcgctcccctgttcggcggacgacgggtgga  
 E Y Y Y N L A Q F E S L P C S A D D G G

**(D)**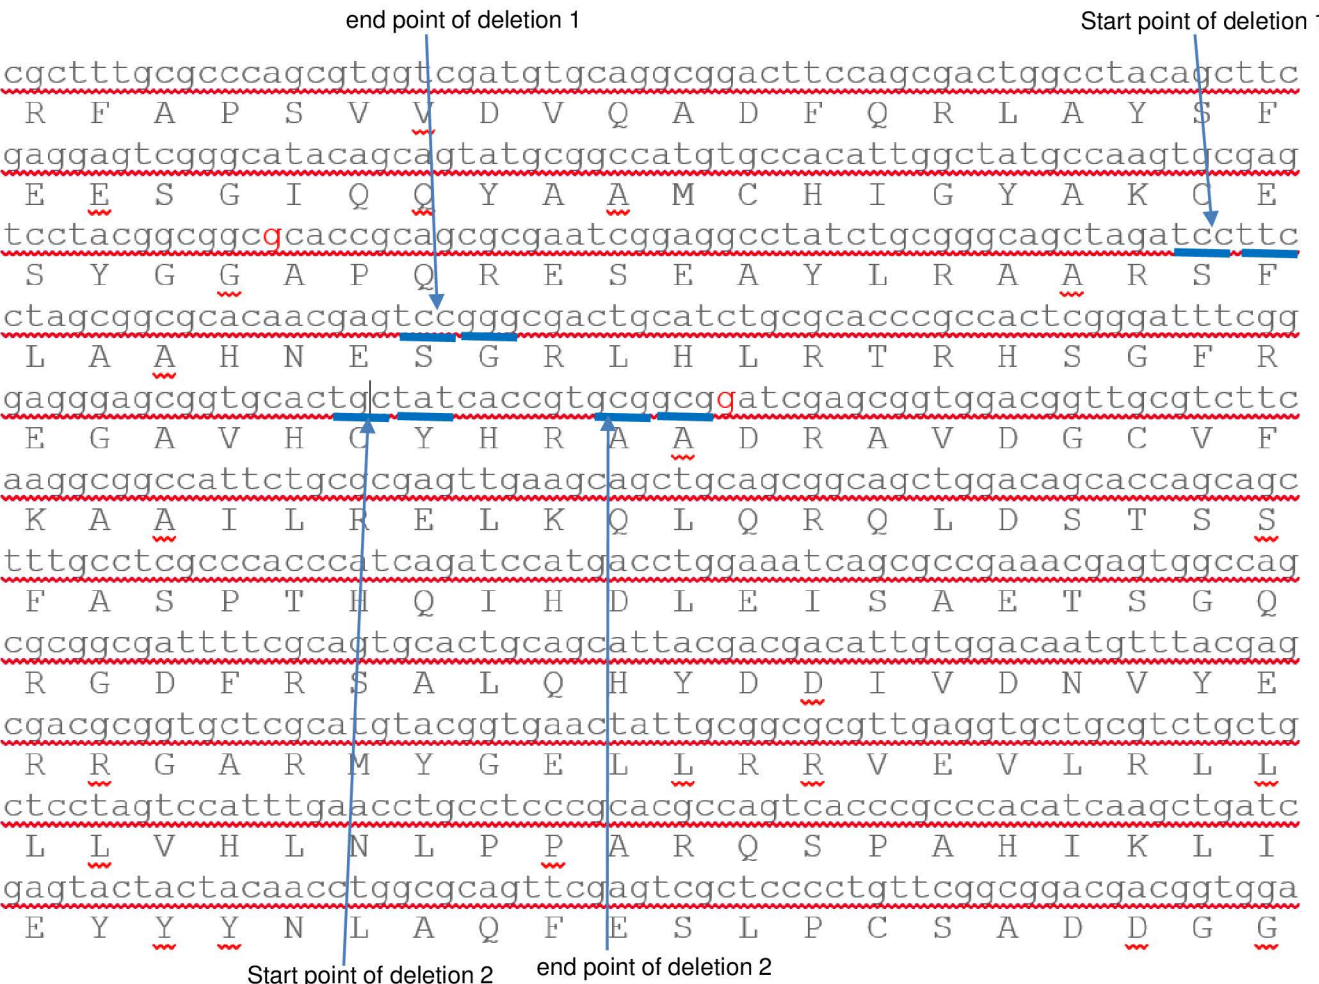



**(E)**

end point of deletion

Start point of deletion

cgctttgcgccacagcgtggtcgatgtgcaggcggacttcacagcgaactggcctacagcttc  
 R F A P S V V D V Q A D F Q R L A Y S F  
 gaggagtcgggcatacagcagtatgcggccatgtgccacattggctatgccaaagtggag  
 E E S G I Q Q Y A A M C H I G Y A K C E  
 tcctacggcggcgcaccgcagcgcgaatcggaggcctatctgcgggcagctagatccttc  
 S Y G G A P Q R E S E A Y L R A A R S F  
 ctagcggcgcacaacgagtcggggcactgcactctgcgcaccgcgcactcgggatttcgg  
 L A A H N E S G R L H L R T R H S G F R  
 gagggagcggtgactgctatcaccgtgcggcgcgatcgaagcggatgacgggttgcgcttc  
 E G A V H C Y H R A A D R A V D G C V F  
 aaggcggccattctgcgcgagttgaagcagctgcagcggcagctggacagcaccagcagc  
 K A A I L R E L K Q L Q R Q L D S T S S  
 tttgcctcgcgccaccatcagatccatgacctggaatcagcgcgaaacgagtgccag  
 F A S P T H Q I H D L E I S A E T S G Q  
 cgcggcgattttcgcagtgactgcagcattacgacgacattgtggacaatgtttacgag  
 R G D F R S A L Q H Y D D I V D N V Y E  
 cgacgcggtgctcgcacgtacgggtgaactattgcggcgcggttgagggtgctgcgtctgctg  
 R R G A R M Y G E L L R R V E V L R L L  
 ctctagtcattttgaacctgcctcccgcagcgcagtcacccgccacatcaagctgac  
 L L V H L N L P P A R Q S P A H I K L I  
 gagtactactacaacctggcgcagttcgagtcgctcccctgttcggcggacgacgggtgga  
 E Y Y Y N L A Q F E S L P C S A D D G G

**(F)**

end point of deletion 1

Start point of deletion 1

cgctttgcgccagcgtggtcgatgtgcaggcggacttccagcgactggcctacagcttc  
 R F A P S V V D V Q A D F Q R L A Y S F  
 gagcagtcgggcatacagcagtatgcccgcattgtgccacattggcctatgccaaagtgcgag  
 E E S G I Q Q Y A A M C H I G Y A K C E  
 tctacggcggcgcaccgcagcgcgaatcggaggcctatctgcgggcagctagatccttc  
 S Y G G A P Q R E S E A Y L R A A R S F  
 ctacggcgcacaacgagtcgggcgactgcattctgcgcaccgccactcgggatttcgg  
 L A A H N E S G R L H L R T R H S G F R  
 gagggagcgggtgcactcctatcacctgcccgcgatcgcagcgggtggacggttgcgcttc  
 E G A V H C Y H R A A D R A V D G C V F  
 aaggcggccattctgcgcgagttgaagcagctgcagcggcagctggacagcaccagcagc  
 K A A I L R E L K Q L Q R Q L D S T S S  
 ttgcctcgcgccaccatcagatccatgacctggaatcagcggccgaaacgagtgccag  
 F A S P T H Q I H D L E I S A E T S G Q  
 cgcggcgattttcgcagtgcaactgcagcattacgcagcattgtggacaatgtttacgag  
 R G D F R S A L Q H Y D D I V D N V Y E  
 cgacgcggtgctcgcattgtacggtgaactattgcggcgcggttgaggtgctgcgtctgctg  
 R R G A R M Y G E L L R R V E V L R L L  
 ctctagtcceatttgaacctgctcctccgcacggccagtcaccgccccacatcaagctgatc  
 L L V H L N L P P A R Q S P A H I K L I  
 gagtactactacaactgcccgcagttcgagtcgctccctgttcggcggacgcagcgtgga  
 E Y Y Y N L A Q F E S L P C S A D D G G

Start point of deletion 2, with a insertion of C

end point of deletion 2
